# Supplementary material for: Local structural features and composition of the Bi4Ge3O12:Dy3+ crystals: effect of doping concentration
Source: Royal Society of Chemistry journal article supplement (doi:10.1039/d0ce00729c), 2020-01-01
Supplement: d0ce00729c1.pdf [file d0ce00729c1.pdf]

**Statistical and Local Structure of Dy<sup>3+</sup>-doped Bi<sub>4</sub>Ge<sub>3</sub>O<sub>12</sub> Crystals: a Role of Activator  
Concentration in Structural Effects**

Galina M. Kuz'micheva<sup>a</sup>, Liudmila I. Ivleva<sup>b</sup>, Irina A. Kaurova<sup>a,\*</sup>, Evgeny V. Khramov<sup>c</sup>,

Elizaveta E. Dunaeva<sup>b</sup>, Roman D. Svetogorov<sup>c</sup>, and Victor B. Rybakov<sup>d</sup>

<sup>a</sup>*MIREA - Russian Technological University, 78 Vernadskogo pr., Moscow 119454, Russia*

<sup>b</sup>*Prokhorov General Physics Institute, Russian Academy of Sciences, 38 Vavilova str., Moscow  
119991, Russia*

<sup>c</sup>*National Research Center «Kurchatov Institute», 1 Akademika Kurchatova pl., Moscow  
123182, Russia*

<sup>d</sup>*Lomonosov State University, 1-3 Vorobyovy Gory, Moscow 119992, Russia*

**Supporting Information**

**Table S1.** Coordinates of atoms, anisotropic displacement parameters  $U_{\text{eq}} \times 10^2$  ( $\text{\AA}^2$ ), site occupancies  $p$  (SOF), main interatomic distances  $d$  ( $\text{\AA}$ ) and bond angles ( $\omega$ , deg) in the structures of BGO:Dy crystals according to the XRD data

| Parameter              | $\text{Bi}_4\text{Ge}_3\text{O}_{12}:1.0\text{wt.}\%\text{Dy}_2\text{O}_3$<br>(BGO:1.0%Dy) <sup>a</sup> | $\text{Bi}_4\text{Ge}_3\text{O}_{12}:0.1\text{wt.}\%\text{Dy}_2\text{O}_3$<br>(BGO:0.1%Dy) <sup>b</sup> |
|------------------------|---------------------------------------------------------------------------------------------------------|---------------------------------------------------------------------------------------------------------|
| <b>Bi/Dy (16c)</b>     |                                                                                                         |                                                                                                         |
| $x$                    | 0.08739(4)                                                                                              | 0.91253(8)                                                                                              |
| $p$ (Bi)               | 0.3293(40)                                                                                              | 0.3330(9)                                                                                               |
| $p$ (Dy)               | 0.0040(4)                                                                                               | 0.0003(9)                                                                                               |
| $U_{\text{eq}}$        | 2.05(2)                                                                                                 | 2.28(6)                                                                                                 |
| <b>Ge (12a)</b>        |                                                                                                         |                                                                                                         |
| $x$                    | 0                                                                                                       | 0                                                                                                       |
| $y$                    | 1/4                                                                                                     | 3/4                                                                                                     |
| $z$                    | 3/8                                                                                                     | 5/8                                                                                                     |
| $p$                    | 0.2500                                                                                                  | 0.2500                                                                                                  |
| $U_{\text{eq}}$        | 1.86(5)                                                                                                 | 2.1(1)                                                                                                  |
| <b>O (48e)</b>         |                                                                                                         |                                                                                                         |
| $x$                    | 0.0721(11)                                                                                              | 0.925(3)                                                                                                |
| $y$                    | 0.1260(10)                                                                                              | 0.874(2)                                                                                                |
| $z$                    | 0.2905(9)                                                                                               | 0.710(2)                                                                                                |
| $p$                    | 1.0                                                                                                     | 1.0                                                                                                     |
| $U_{\text{eq}}$        | 2.6(2)                                                                                                  | 3.1(4)                                                                                                  |
| Bi– 3 × O1<br>– 3 × O2 | 2.177(10)<br>2.587(10)                                                                                  | 2.17(2)<br>2.59(2)                                                                                      |
| [Bi–O] <sub>avr</sub>  | 2.382                                                                                                   | 2.38                                                                                                    |
| Ge – 4 × O             | 1.748(10)                                                                                               | 1.76(2)                                                                                                 |
| O2–Ge–O2               | 104.9(3)                                                                                                | 104.7(6)                                                                                                |
| O2–Ge–O2               | 119.0(6)                                                                                                | 119.5(9)                                                                                                |
| O1–Bi–O2               | 84.5(4)                                                                                                 | 84.5(3)                                                                                                 |
| O1–Bi–O2               | 70.8(4)                                                                                                 | 70.9(8)                                                                                                 |
| O1–Bi–O1               | 84.52(15)                                                                                               | 83.4(9)                                                                                                 |
| O2–Bi–O2               | 153.7(4)                                                                                                | 152.7(9)                                                                                                |

<sup>a</sup> right form, <sup>b</sup> left form

**Table S2.** Coordinates of atoms, isotropic displacement parameters  $U_{\text{iso}}$  ( $\text{\AA}^2$ ), site occupancies  $p$  (SOF) and main interatomic distances  $d$  ( $\text{\AA}$ ) in the structures of powdered BGO:Dy crystals according to the Rietveld refinement

| Parameter                                                                           | $\text{Bi}_4\text{Ge}_3\text{O}_{12}:1.0\text{wt.}\%\text{Dy}_2\text{O}_3$<br>( <b>BGO:1.0%Dy</b> ) | $\text{Bi}_4\text{Ge}_3\text{O}_{12}:0.1\text{wt.}\%\text{Dy}_2\text{O}_3$<br>( <b>BGO:0.1%Dy</b> ) |
|-------------------------------------------------------------------------------------|-----------------------------------------------------------------------------------------------------|-----------------------------------------------------------------------------------------------------|
| $a$ , $\text{\AA}$                                                                  | 10.52689(9)                                                                                         | 10.52421(4)                                                                                         |
| Scherrer size, nm                                                                   | 680                                                                                                 | 1330                                                                                                |
| Bi/Dy<br>$x x x$<br>$U_{\text{iso}}$<br>$p$ (Bi)<br>$p$ (Dy)                        | 0.08732(4)<br>0.01604(12)<br>0.993(1)<br>0.007(1)                                                   | 0.08737(6)<br>0.0269(2)<br>0.998(1)<br>0.002(1)                                                     |
| Ge<br>$x y z$<br>$U_{\text{iso}}$<br>$p$                                            | 0 0 0<br>0.0184(6)<br>1.0                                                                           | 0 0 0<br>0.0236(12)<br>1.0                                                                          |
| O<br>$x y z$<br>$U_{\text{iso}}$<br>$p$                                             | 0.0714(4) 0.1261(4) 0.2897(4)<br>0.0221(15)<br>1.0                                                  | 0.0699(6) 0.1297(7) 0.2868(6)<br>0.030(4)<br>1.0                                                    |
| $R_p/R_{\text{wp}}/GOF$                                                             | 0.75/1.35/1.19                                                                                      | 1.36/2.44/1.89                                                                                      |
| Bi $- 3 \times \text{O1}$<br>$- 3 \times \text{O2}$<br>$[\text{Bi-O}]_{\text{avr}}$ | 2.169(4)<br>2.591(5)<br>2.380                                                                       | 2.148(3)<br>2.640(5)<br>2.394                                                                       |
| Ge $- 4 \times \text{O}$                                                            | 1.748(4)                                                                                            | 1.729(4)                                                                                            |

**Table S3.** The results of two-sphere EXAFS fit for BGO:Dy crystals (Bi  $L_3$ -edge;  $k$ -range: 2 – 13  $\text{\AA}^{-1}$ ;  $R$ , interatomic distance (the length for single scattering path); CN, coordination number;  $\sigma^2$ , the Debye–Waller factor ). Coordination numbers were defined to be equal during the fit.

| Sample                                                                        | $R_{\text{Bi-O}}$ , $\text{\AA}$ | CN Bi         | $\sigma^2$ , $\text{\AA}^2$ | $R_f$ , % |
|-------------------------------------------------------------------------------|----------------------------------|---------------|-----------------------------|-----------|
| $\text{Bi}_4\text{Ge}_3\text{O}_{12}:1.0\%\text{Dy}$<br>( <b>BGO:1.0%Dy</b> ) | $2.13 \pm 0.012$                 | $2.9 \pm 0.4$ | $0.0038 \pm 0.001$          | 0.9       |
|                                                                               | $2.57 \pm 0.016$                 | $2.9 \pm 0.4$ | $0.0057 \pm 0.002$          |           |
| $\text{Bi}_4\text{Ge}_3\text{O}_{12}:1.0\%\text{Dy}$<br>( <b>BGO:0.1%Dy</b> ) | $2.13 \pm 0.001$                 | $2.5 \pm 0.3$ | $0.0020 \pm 0.001$          | 1.0       |
|                                                                               | $2.58 \pm 0.015$                 | $2.5 \pm 0.3$ | $0.0045 \pm 0.002$          |           |

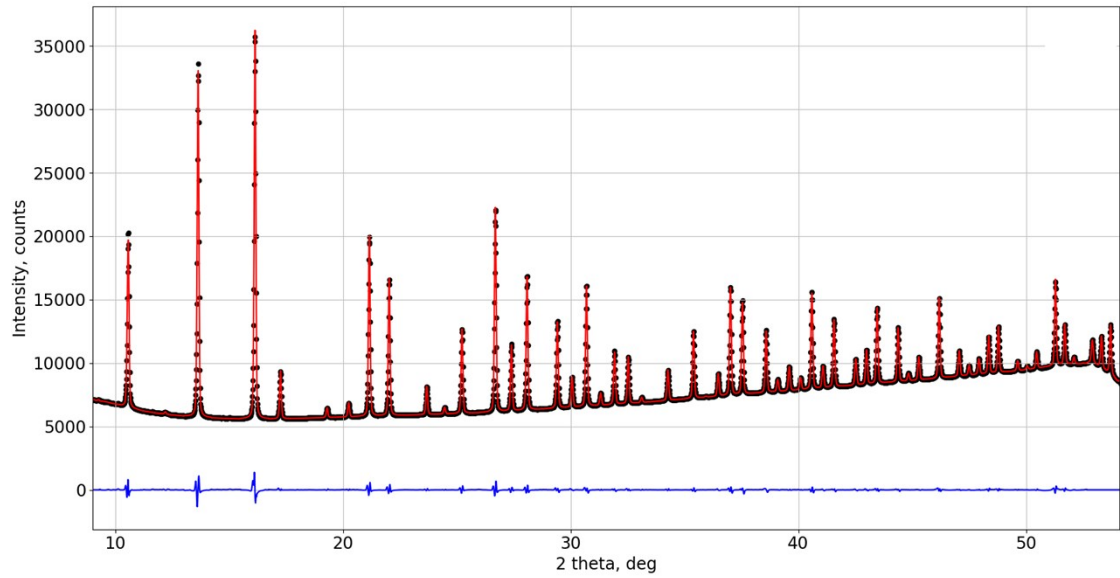

**Figure S1.** Observed (black dots), calculated (red line), and difference (blue line) X-ray powder patterns for BGO:1.0%Dy sample.

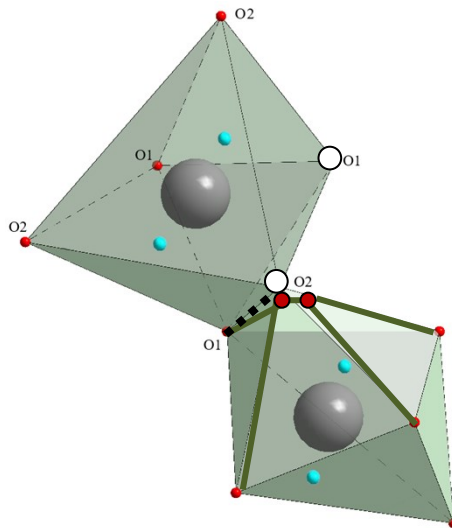

**Figure S2.** An idealized model of rearrangement of the  $\text{BiO}_6$  octahedron into a vacancy octahedron ( $\text{BiO}_5$ ) and  $\text{DyO}_6$  octahedron into a  $\text{DyO}_7$  octahedron with a split vertex.

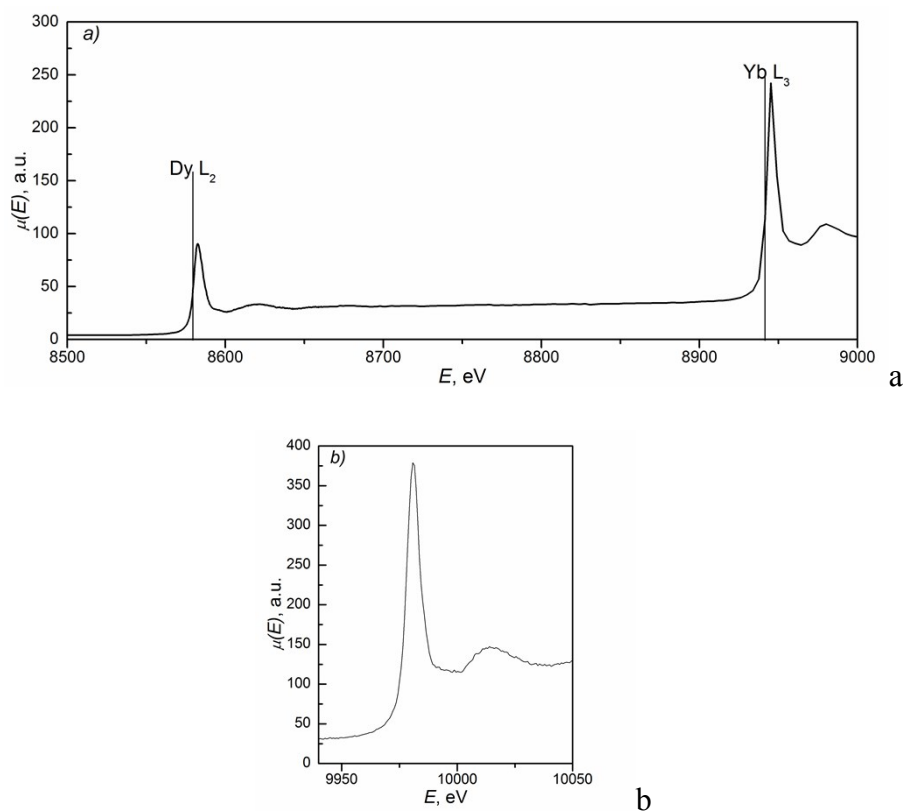

**Figure S3.** The Dy  $L_2$  and Yb  $L_3$  edge steps (a) and the Yb  $L_2$  edge step (b) for the BGO:1.0%Dy sample. The fluorescence is normalized to the intensity of the incident beam.

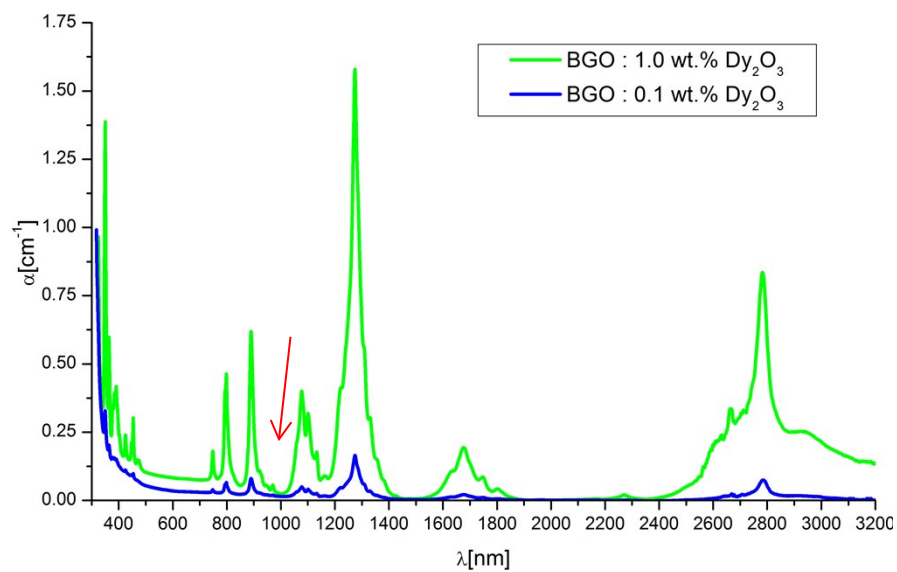

**Figure S4.** Absorption spectra for the BGO:1.0%Dy and BGO:0.1%Dy samples.

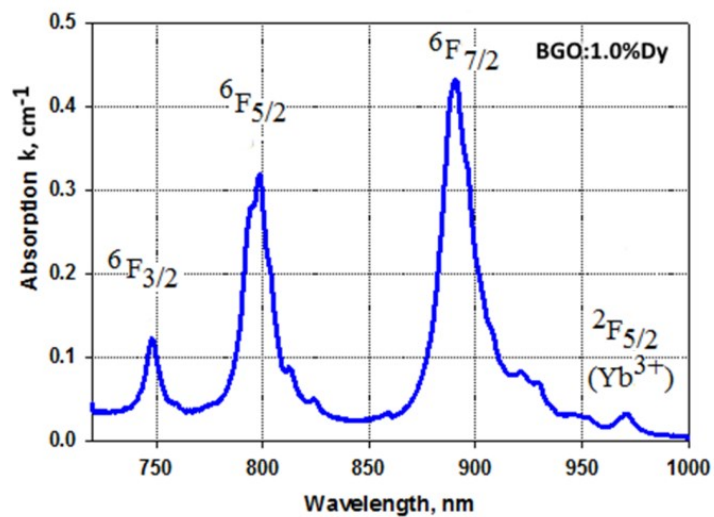

Figure S5. A part of the absorption spectra of the BGO:1.0%Dy.

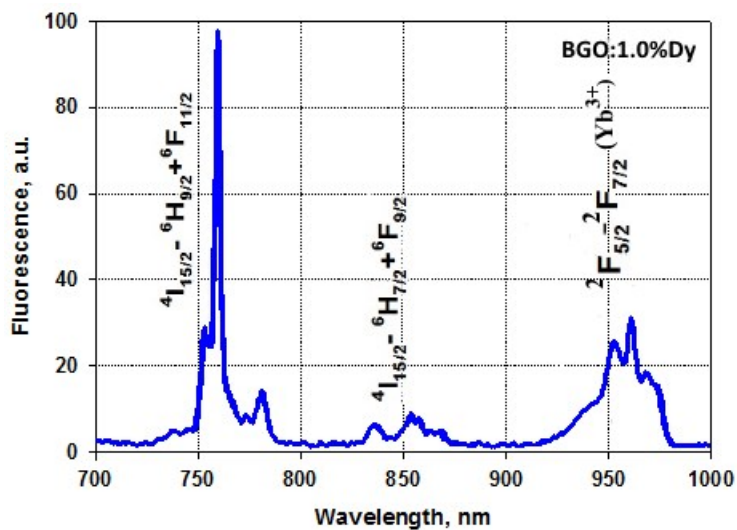

Figure S6. Luminescence spectrum for the BGO:1.0%Dy crystal under excitation by diode laser at 453 nm.
